# Supplementary material
Source: PubMed Central journal article supplement (PMC5033845)
Supplement: jciinsight-1-87607-s001.pdf [file jciinsight-1-87607-s001.pdf]

## **Supplemental Material**

### **PRL3-zumab, A First-in-Class Humanized Antibody for Cancer Therapy**

Min Thura<sup>1†</sup>, Abdul Qader Omer Al-Aidaros<sup>1†</sup>, Wei Peng Yong<sup>2,3</sup>, Koji Kono<sup>3,4</sup>, Abhishek Gupta<sup>1</sup>, You Bin Lin<sup>1</sup>, Kousaku Mimura<sup>3</sup>, Jean Paul Thiery<sup>1,3</sup>, Boon Cher Goh<sup>2,3</sup>, Patrick Tan<sup>5</sup>, Ross Soo<sup>2,3</sup>, Cheng William Hong<sup>6</sup>, Lingzhi Wang<sup>3</sup>, Suling Joyce Lin<sup>5</sup>, Elya Chen<sup>4</sup>, Sun Young Rha<sup>7</sup>, Hyun Cheol Chung<sup>7</sup>, Jie Li<sup>1</sup>, Sayantani Nandi<sup>1</sup>, Hiu Fung Yuen<sup>1</sup>, Shu-Dong Zhang<sup>8</sup>, Yeoh Khay Guan<sup>9</sup>, Jimmy So<sup>9,10</sup>, and Qi Zeng<sup>1\*</sup>

**A**

normal human tissue microarray

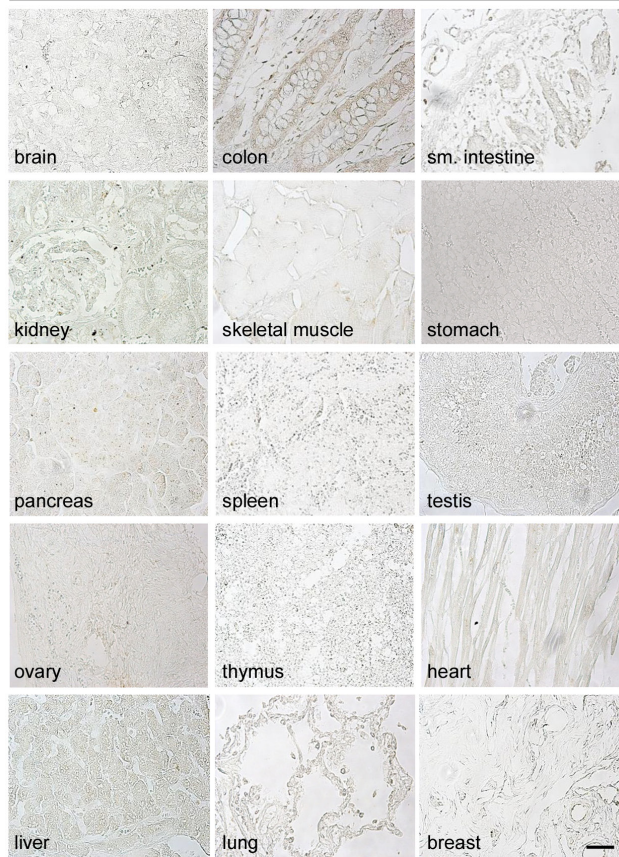

**B**

adjacent normal-tumor human gastric sections

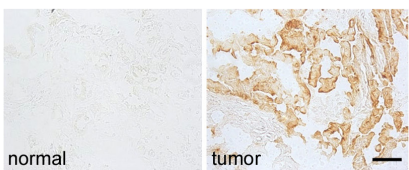

**Supplemental Figure 1.** PRL-3 is not expressed in most normal adult human tissues, but strongly expressed in human gastric tumors. **(A)** Multiple normal human tissues from various organs were analyzed by immunohistochemistry (IHC) for PRL-3 protein. **(B)** By IHC, PRL-3 protein was not detected in an adjacent normal gastric tissue section, but was strongly detected in gastric tumor section from the same patient. *Bar*, 50 $\mu$ m.

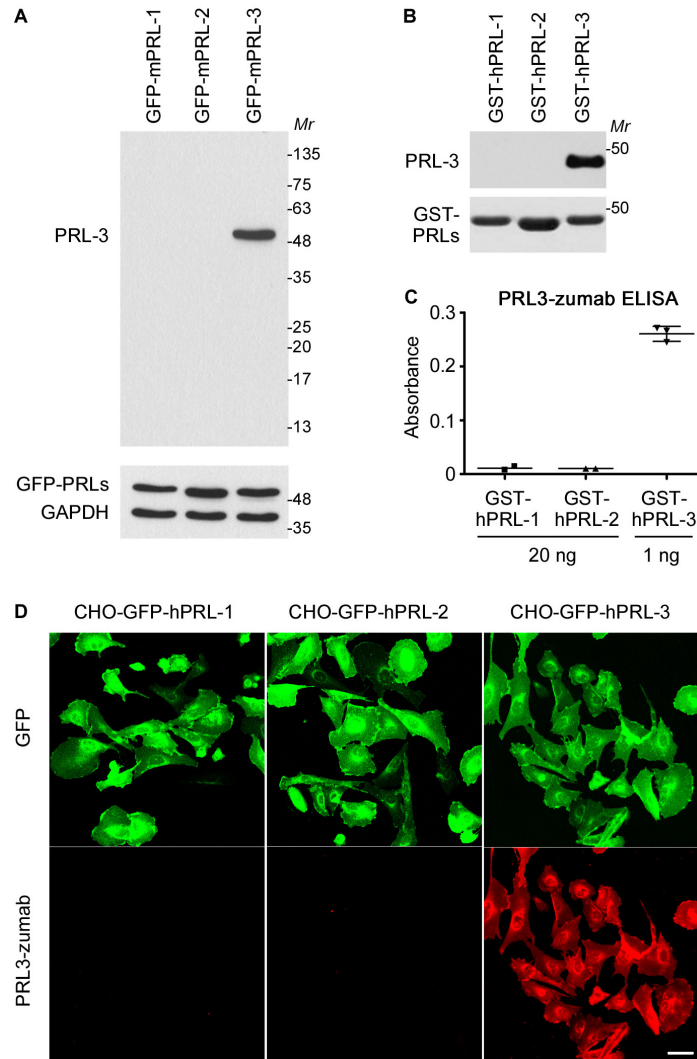

**Supplemental Figure 2.** PRL3-zumab specifically binds to both murine and human PRL-3, but not to their homologues PRL-1 or PRL-2. **(A)** Western blotting of Chinese Hamster ovary (CHO) cells overexpressing GFP-tagged murine isoforms of PRL-1 (GFP-mPRL-1), PRL-2 (GFP-mPRL-2), or PRL-3 (GFP-mPRL-3). Blots were probed with PRL3-zumab (upper panel), or anti-GFP and anti-GAPDH antibodies concurrently (lower panel). **(B)** Western blotting of 1 ng of GST-tagged recombinant human isoforms of PRL-1 (GST-hPRL-1), PRL-2 (GST-hPRL-2), or PRL-3 (GST-hPRL-3). Blots were probed with PRL3-zumab (upper panel) or anti-GST antibodies (lower panel). **(C)** ELISA analysis of PRL3-zumab specific binding to recombinant GST-hPRLs. PRL3-zumab readily binds GST-hPRL-3, but not 20-fold higher amounts of GST-hPRL-1 or GST-hPRL-2.  $n = 3$  per analysis;  $p < 0.001$ , one-way ANOVA; data representing mean  $\pm$  SD. **(D)** Immunofluorescence staining of CHO cells overexpressing GFP-hPRL-1, GFP-hPRL-2, or GFP-hPRL-3 using PRL3-zumab. *Red*, PRL3-zumab signal. *Green*, GFP-hPRL signal. *Bar*, 40  $\mu$ m.

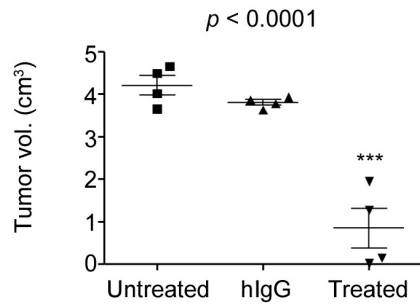

**Supplemental Figure 3.** PRL3-zumab, but not human IgG isotype control, suppresses PRL-3-positive gastric tumor growth *in vivo*. Eight-week old male BALB/C nude mice were implanted with PRL-3-positive SNU-484 cell lines to induce orthotopic gastric tumors. The dot plot indicates the mean tumor volume of SNU-484 tumors in untreated, human IgG-treated (hlgG), and PRL3-zumab-treated mice.  $p < 0.0001$ , one-way ANOVA;  $n = 4$  per group, data representing mean  $\pm$  SEM. \*\*\* $p < 0.001$ , Tukey's post-hoc test (untreated vs treated groups).

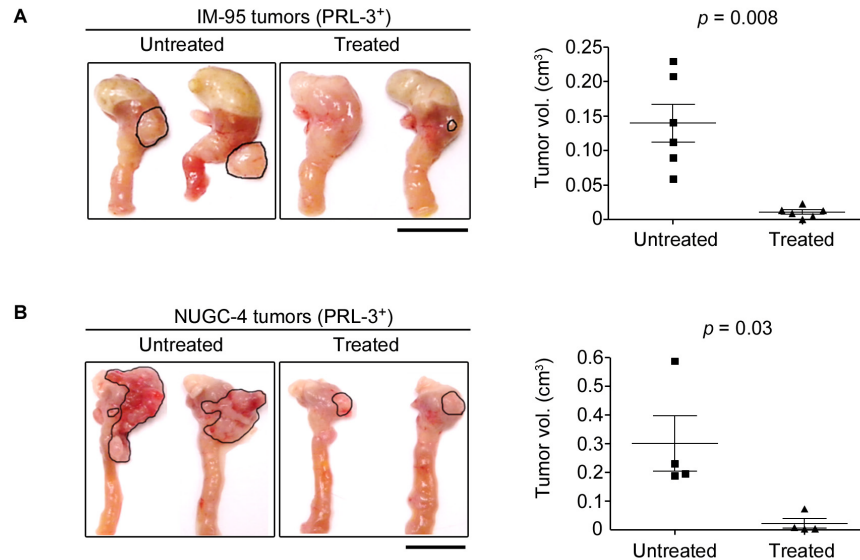

**Supplemental Figure 4.** PRL3-zumab blocks orthotopic PRL-3<sup>+</sup> gastric tumors. Eight-week old male BALB/C *nude* mice were implanted with PRL-3<sup>+</sup> IM-95 or NUGC-4 gastric cancer cells to induce orthotopic PRL-3<sup>+</sup> gastric tumors. At the end of the experiment, visible tumors (outlined in black) were measured and volumes compared. **(A)** Stomachs with IM-95 tumors from untreated and PRL3-zumab-treated mice. *Bar*, 10 mm. *Rightmost panel*, mean tumor volumes.  $p = 0.008$ , *t*-test;  $n = 6$  per group, data representing mean  $\pm$  SEM. **(B)** Stomachs with NUGC-4 tumors from untreated and PRL3-zumab-treated mice. *Bar*, 10 mm. *Rightmost panel*, mean tumor volumes.  $p = 0.03$ , *t*-test;  $n = 4$  per group, data representing mean  $\pm$  SEM.

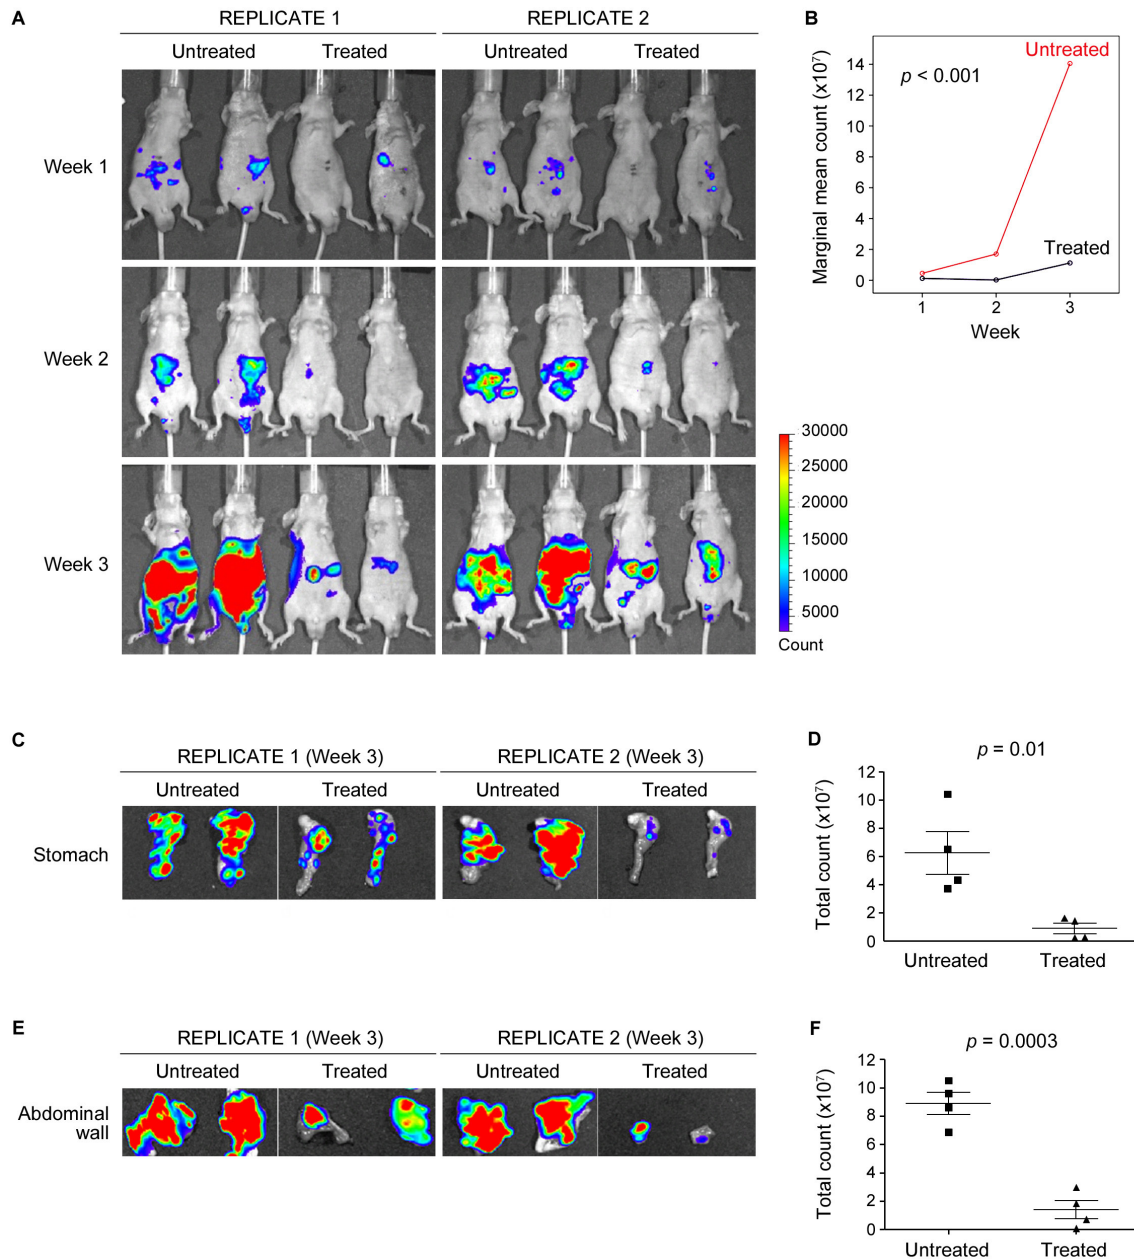

**Supplemental Figure 5.** PRL3-zumab inhibits local and metastatic abdominal tumors formed by PRL-3<sup>+</sup> HCT116 colorectal cancer cells implanted within the stomach. HCT116-luc2 cells were implanted into the gastric subserosa layer of mice stomachs to mimic secondary colorectal cancer metastasis to the gastric niche. PRL3-zumab treatment reduced growth of HCT116-luc2 tumors in the gastric niche. **(A)** IVIS imaging of global *in vivo* tumor growth over 3 weeks post-inoculation. **(B)** Mice from **(A)** were analyzed for whole-animal IVIS intensity changes over time.  $n = 4$  per group;  $p < 0.001$ , two-way ANOVA. **(C)** Tumor burden in excised stomachs at the end of week 3. **(D)** Stomachs from **(C)** were analyzed for differences in IVIS intensity.  $n = 4$  per group;  $p = 0.01$ , *t*-test; data representing mean  $\pm$  SEM. **(E)** Metastatic tumor burden within abdominal walls at the end of week 3. **(F)** Stomachs from **(E)** were analyzed for differences in IVIS intensity.  $n = 4$  per group;  $p = 0.0003$ , *t*-test; data representing mean  $\pm$  SEM.

**Supplemental Table 1.** Clinical characteristics of SGset1 gastric cancer patient cohort.

|                                  | <b>SGset1 (<i>n</i> = 185)</b> |
|----------------------------------|--------------------------------|
| Age (years)                      |                                |
| Range                            | 23.4 – 92.9 (1 missing)        |
| Mean ± S.D.                      | 64 ± 12.9 (1 missing)          |
| Gender (%)                       |                                |
| Male                             | 68 (36.8)                      |
| Female                           | 116 (62.7)                     |
| Missing                          | 1 (0.54)                       |
| Stage (%)                        |                                |
| 1                                | 29 (15.7)                      |
| 2                                | 30 (16.2)                      |
| 3                                | 66 (35.7)                      |
| 4                                | 59 (31.9)                      |
| Missing                          | 1 (0.54)                       |
| Lauren's histopathology (%)      |                                |
| Intestinal                       | 92 (49.7)                      |
| Diffuse                          | 72 (38.9)                      |
| Mixed/unclassifiable             | 20 (10.8)                      |
| Missing                          | 1 (0.54)                       |
| Helicobacter Pylori status (%)   |                                |
| Positive                         | 59 (31.9)                      |
| Negative                         | 37 (20.0)                      |
| Missing                          | 89 (48.1)                      |
| Median overall survival (months) | 22.5 (1 missing)               |
| Number of overall death events   | 110 (2 missing)                |

**Supplemental Table 2.** Univariate and multivariate Cox regression analysis of PRL-3 expression in SGset1 cohort.

|                                                               | <b>Category</b> | <b>HR (95% C.I.)</b> | <b><i>p</i>-value</b> |
|---------------------------------------------------------------|-----------------|----------------------|-----------------------|
| <b>Univariate Cox</b><br>(PRL-3 expression)                   | Med vs Low      | 2.35 (1.42 – 3.87)   | 0.0008                |
|                                                               | High vs Low     | 1.94 (1.17 – 3.21)   | 0.01                  |
| <b>Multivariate Cox</b><br>(PRL-3 expression,<br>tumor stage) | Med vs Low      | 1.99 (1.19 – 3.33)   | 0.009                 |
|                                                               | High vs Low     | 1.76 (1.76 – 2.95)   | 0.03                  |



**Supplemental Table 3.** ANOVA analysis of SNU-484 tumor volume after treatment (from Main Figure 4A).

| <b>Factor assessed</b>        | <b><i>p</i> value<sup>a</sup></b> |
|-------------------------------|-----------------------------------|
| Control vs PRL3-zumab         | < 0.001                           |
| Control vs PRL3-zumab/5-FU    | < 0.001                           |
| Control vs 5-FU               | < 0.001                           |
| PRL3-zumab vs control         | < 0.001                           |
| PRL3-zumab vs PRL3-zumab/5-FU | < 0.001                           |
| PRL3-zumab vs 5-FU            | < 0.001                           |
| PRL3-zumab/5-FU vs control    | < 0.001                           |
| PRL3-zumab/5-FU vs PRL3-zumab | < 0.001                           |
| PRL3-zumab/5-FU vs 5-FU       | < 0.001                           |
| 5-FU vs control               | < 0.001                           |
| 5-FU vs PRL3-zumab            | < 0.001                           |
| 5-FU vs PRL3-zumab/5-FU       | < 0.001                           |

<sup>a</sup>*p* values calculated using post-hoc Tukey's HSD test

**Supplemental Table 4.** ANOVA analysis of WBC counts after treatment (from Main Figure 4B).

| <b>Factor assessed</b>        | <b><i>p</i> value<sup>a</sup></b> |
|-------------------------------|-----------------------------------|
| Control vs PRL3-zumab         | 0.438                             |
| Control vs PRL3-zumab/5-FU    | < 0.001                           |
| Control vs 5-FU               | < 0.001                           |
| PRL3-zumab vs control         | 0.438                             |
| PRL3-zumab vs PRL3-zumab/5-FU | < 0.001                           |
| PRL3-zumab vs 5-FU            | < 0.001                           |
| PRL3-zumab/5-FU vs control    | < 0.001                           |
| PRL3-zumab/5-FU vs PRL3-zumab | < 0.001                           |
| PRL3-zumab/5-FU vs 5-FU       | 0.836                             |
| 5-FU vs control               | < 0.001                           |
| 5-FU vs PRL3-zumab            | < 0.001                           |
| 5-FU vs PRL3-zumab/5-FU       | 0.836                             |

<sup>a</sup>*p* values calculated using post-hoc Tukey's HSD test
